# Supplementary material
Source: publisher figshare collection journal article supplement (https://frontiersin.figshare.com/ndownloader/files/23336723)

## Supplementary materials

**Supplementary Figure S1. Preparation and identification of IgM<sup>+</sup> B cells from porcine Peyer's patches.** Total lymphocytes were isolated from porcine Peyer's patches and incubated with IgM primary antibody for 30min at 4°C, followed by Alexa Fluor® 647 conjugated anti-mouse IgG (Abcam). IgM<sup>+</sup> B cells magnetically were separated. 7-AAD (BD Bioscience) was used to label nonviable cells. The percentage of IgM<sup>+</sup> B cells in total lymphocytes or purified IgM<sup>+</sup> cells were tested by flow cytometry. (C-D) Representative flow cytometry plots showing the percentage of IgM<sup>+</sup> B cells in total PP lymphocytes (C) and in purified PP IgM<sup>+</sup> cells (D).

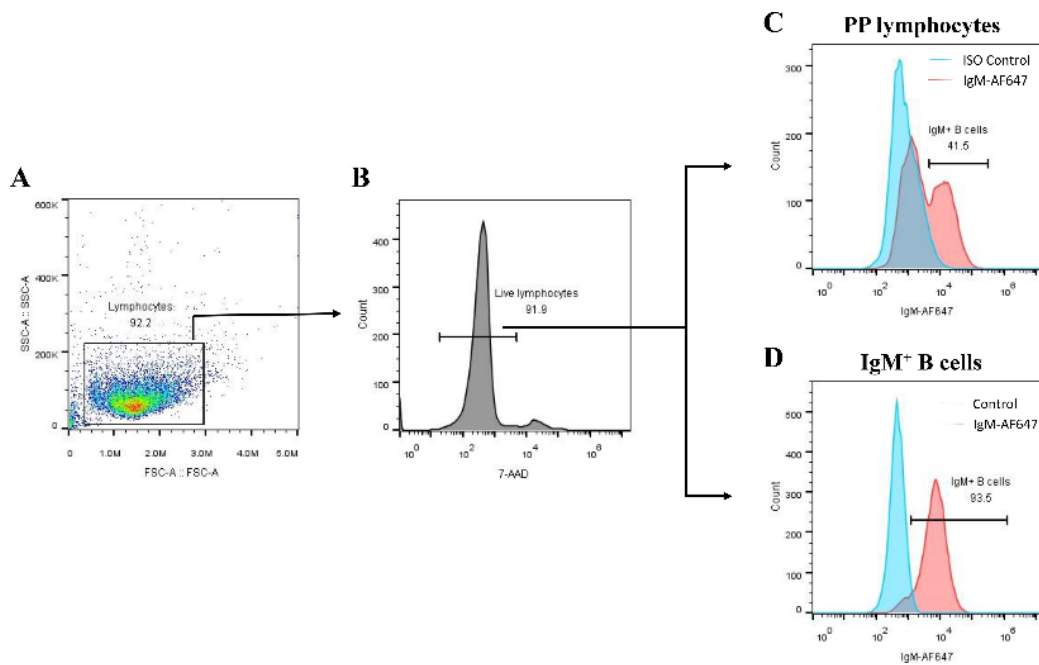

**Supplementary Figure S2. Sequence analysis of porcine GLT $\alpha$ , PST $\alpha$  and CT $\alpha$ .** Porcine GLT $\alpha$ , PST $\alpha$  and CT $\alpha$  were amplified by PCR and linked to sequencing vector, followed by sequencing. The sequences were aligned with *Sus scrofa* IgH constant region gene sequences. The sequence structures of these three molecular markers for porcine IgA CSR were shown.

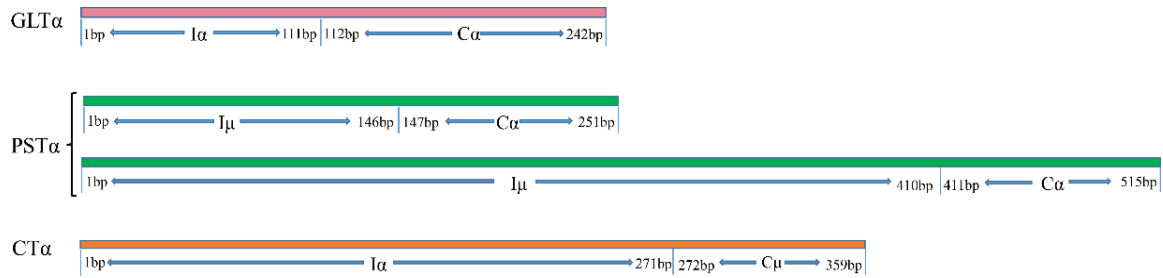

**Supplementary Figure S3. IL-21 promotes IgA production and IgA class switch recombination in porcine spleen B cells.** IgM<sup>+</sup> B cells were isolated from porcine spleen and cultured with or without CD40L and IL-21. IgA levels in the supernatant were measured at 6 days post stimulation by ELISA (A) and all the negative values are zeroed during analyzing. The expression level of GLT $\alpha$ , PST $\alpha$ , and CT $\alpha$  were detected at 3 days post treatment (B) and all these PCR products were verified by DNA sequencing. Additionally, their density ratio were normalized by *GAPDH* and calculated (C).

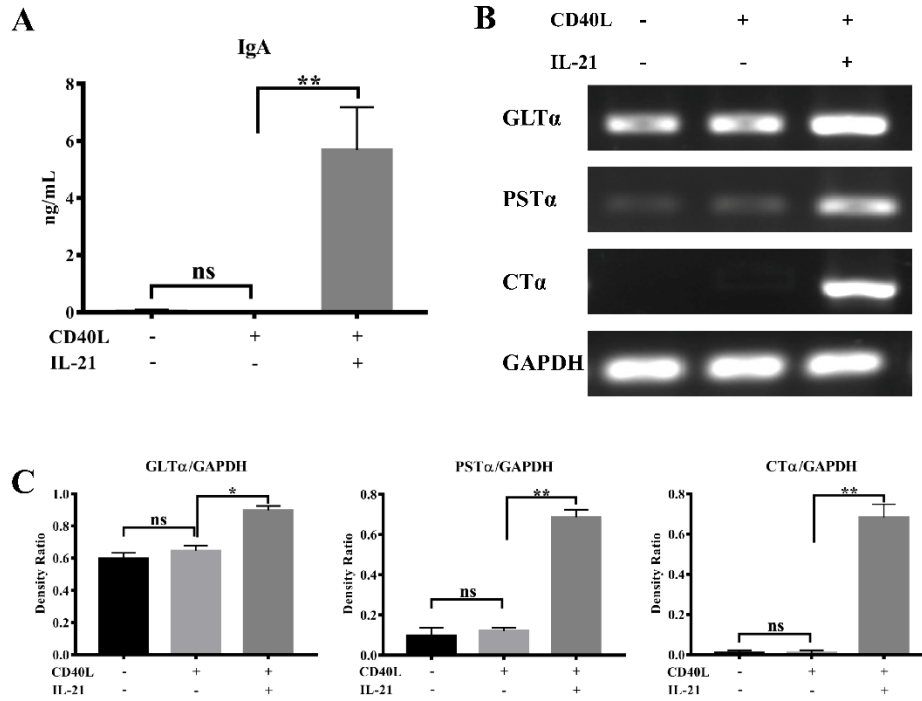

**Supplementary Figure S4. MAPK signaling pathway is not inhibited by Solcitinib and Fludarabine.** IgM<sup>+</sup> B cells were treated with different concentrations of Solcitinib (A) or Fludarabine (B) for 24 hours, then stimulated with CD40L+IL21 for 2 hours. The total amount as well as phosphorylated P38 and ERK1/2 proteins were detected by western blot.

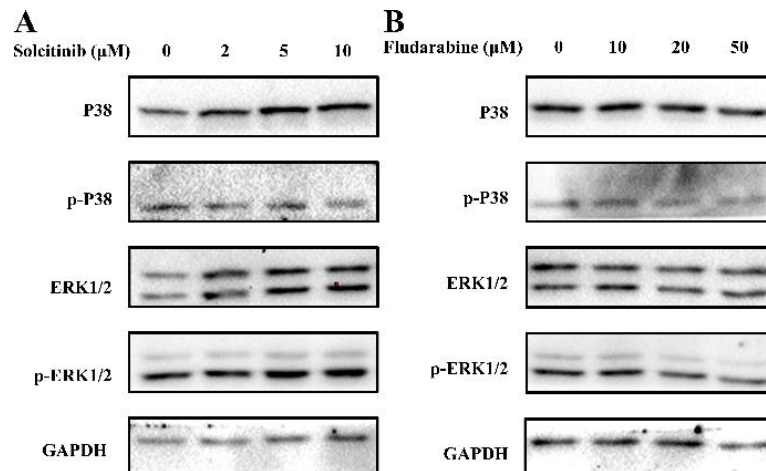

Supplement: Supplementary file [file 23336723]
